# Supplementary material for: “What will my child think of me if he hears I gave him HIV?”: a sequential, explanatory, mixed-methods approach on the predictors and experience of caregivers on disclosure of HIV status to infected children in Gombe, Northeast Nigeria
Source: Springer Nature journal article supplement (doi:10.1186/s12889-020-08506-x), 2020-03-20
Supplement: MOESM1 [file 17819536]

**Additional file 1:** pretested quantitative questionnaire

**The Paediatric HIV disclosure study: a sequential, explanatory, mixed methods approach to explore predictors and caregivers' experiences on disclosure to children living with HIV in Gombe, northeast Nigeria.**

**Code:** |\_|\_|\_|\_|\_|

**Child's Biodata**

1. Age of your Child as at their last birthday (years): |\_|\_|
2. Sex of Child: |\_|\_|\_|\_|\_|\_|\_|
3. Ethnicity: |\_|\_|\_|\_|\_|\_|\_|\_|\_|\_|\_|\_|
4. Is your child attending school? Yes |\_| No |\_|

**Caregiver's Biodata**

5. Caregiver's Religion: |\_|\_|\_|\_|\_|\_|\_|\_|\_|\_|\_|\_|\_|
6. Caregiver's sex: |\_|\_|\_|\_|\_|\_|\_|\_|\_|
7. Caregiver's age as at your last birthday: |\_|\_|
8. Caregiver's highest level of education: |\_|\_|\_|\_|\_|\_|\_|\_|\_|\_|
9. Caregiver's relationship with Child: *Biological Parent* |\_| *Others (Specify)*  
|\_|\_|\_|\_|\_|\_|\_|\_|\_|
10. Caregiver's HIV status: *Positive* |\_| *Negative* |\_| *Unknown* |\_|

**Caregivers opinions on HIV disclosure to children**

11. Do you think children should be told their HIV status? Yes |\_| No |\_| Unsure |\_|
12. What age (in years) do you think is appropriate to tell children about their HIV status: |\_|\_|
13. Do you think there are benefits of telling children their HIV status? Yes |\_| No |\_| Unsure |\_|

**Child's HIV-related clinical information**

14. How old (in years) was your child when he/she was first diagnosed with HIV? |\_|\_|
15. Is your child on any HIV medicines? Yes |\_| No |\_|
16. If **Yes**, how long (in years) has your child been on HIV medicines? |\_|\_|
17. Has your child's HIV status been disclosed to them? (*i.e. if they been told they have HIV, or the word HIV or AIDS has been used in a discussion regarding their illness*) Yes |\_| No |\_|
18. If **Yes**, who told him/her about their HIV status for the first time? Mother |\_| Father |\_|  
Healthcare worker |\_| Others (specify) |\_|\_|\_|\_|\_|\_|\_|\_|\_|
19. At what age (in years) was your child told about their HIV status for the first time? |\_|\_|
